# Supplementary material for: Reduction in Interferon-Stimulated Genes Contributes to High-Yield Production of Influenza Virus in Suspension MDCK Cells
Source: MDPI journal article supplement (doi:10.3390/vaccines12030287), 2024-03-09
Supplement: s1 [file s1]

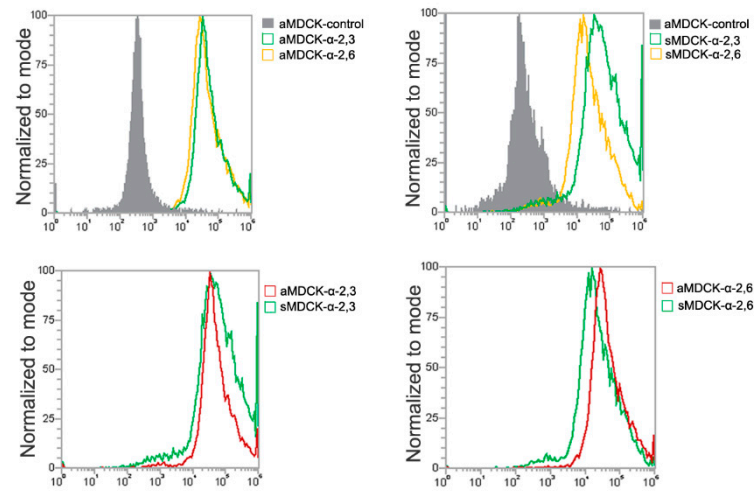

Supplementary Figure S1. Flowcytometric assay of  $\alpha$ -2,3 and  $\alpha$ -2,6 SA receptor in aMDCK and sMDCK cells.
